# Supplementary material
Source: MDPI journal article supplement (https://www.mdpi.com/2073-4395/12/10/2544)
Supplement: s1 [file s1 › agronomy-1908771-SI.pdf]

**Supplementary Materials:** The next set of questions were addressed by the expert group. Five questions were used for the corresponding spatial characterisation by expert observations for both the Co1 and Co2 component score maps for the year 2020 (Figures 7 and 8), these being:

1. In your opinion, are there any spatial structures in these maps?
2. Do these spatial structures have similarities with spatial representations associated with your expertise in viticulture?
3. If so, what do you think are the reasons for these different spatial patterns?
4. Do the spatial structures contained in these maps seem to you to be of interest for agriculture
5. If so, how could you imagine integrating and using it in your expertise?

As for the comparison between the two years (2019 and 2020) for the Co2 component (Figure 9), only 1 question was formulated:

1. What do you think are the reasons for these different spatial patterns between the two consecutive years?
